# Supplementary material
Source: PubMed Central journal article supplement (PMC2719367)
Supplement: M109.006759_1.pdf [file M109.006759_1.pdf]

**Supplementary table 1:**

| <b>Primer</b>    | <b>Sequence</b>                   |
|------------------|-----------------------------------|
| 18S rRNA forward | 5'-TCA AGA ACG AAA GTC GGA GG-3'  |
| 18S rRNA reverse | 5'-GGA CAT CTA AGG GCA TCA C-3'   |
| ANF/Nppa forward | 5'-ACC TGC TAG ACC ACC TGG AGG-3' |
| ANF/Nppa reverse | 5'-GCT GTT ATC TTC CGT ACC GG-3'  |
| BNP/Nppb forward | 5'-GCA GCA TGG ATC TCC AGA AGG-3' |
| BNP/Nppb reverse | 5'-CTG CAG CCA GGA GGT CTT CC-3'  |
| DYRK1A forward   | 5'-TGG CAC TTG GAG CTT AAA GAA-3' |
| DYRK1A reverse   | 5'-GGG GTC ATA ATC AAG CAT CC-3'  |
